# Supplementary material for: Multifunctional Nanoplatform Based on Sunitinib for Synergistic Phototherapy and Molecular Targeted Therapy of Hepatocellular Carcinoma
Source: Micromachines (Basel). 2023 Mar 7;14(3):613. doi: 10.3390/mi14030613 (PMC10059596; doi:10.3390/mi14030613)
Supplement: Supplementary file 1 [file micromachines-14-00613-s001.zip › micromachines-2195718-supplementary.pdf]

## Supporting information

### **Multifunctional Nanoplatfrom Based on Sunitinib for Synergistic Phototherapy and Molecular Targeted Therapy of Hepatocellular Carcinoma**

Wenjing Xu<sup>1,†</sup>, Meng Yang<sup>2,†</sup>, Du Xuanlong<sup>1</sup>, Hao Peng<sup>1</sup>, Yue Yang<sup>1</sup>, Jitao Wang<sup>1</sup>, Yewei Zhang<sup>3,\*</sup>

<sup>1</sup> School of Medicine, Southeast University, Nanjing 210009, China.

<sup>2</sup> Department of Ultrasound, State Key Laboratory of Complex Severe and Rare Diseases, Peking Union Medical College Hospital, Chinese Academy of Medical Sciences and Peking Union Medical College, Beijing, China.

<sup>3</sup> Hepatopancreatobiliary Center, The Second Affiliated Hospital of Nanjing Medical University, Nanjing, 210011, China.

\* Correspondence: zhangyewei@njmu.edu.cn

<sup>†</sup>These authors contributed equally.

## Figures

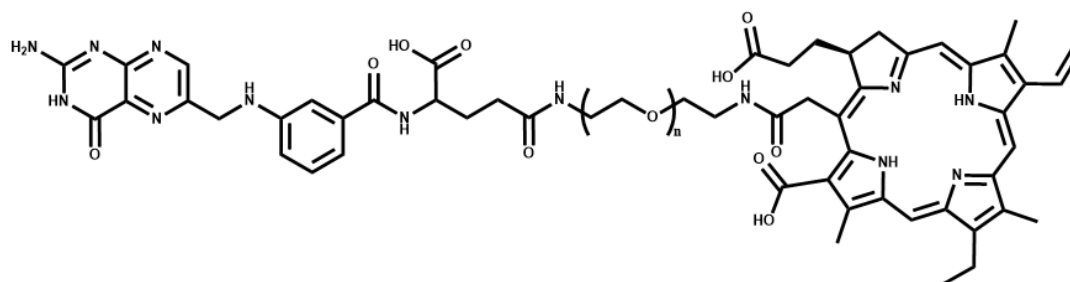

**Figure S1.** The chemical formula of Ce6-PEG2000-FA.

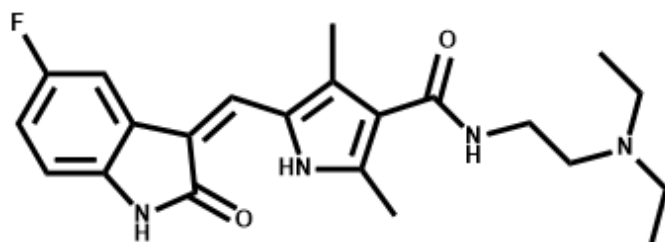

**Figure S2.** The chemical formula of sunitinib.

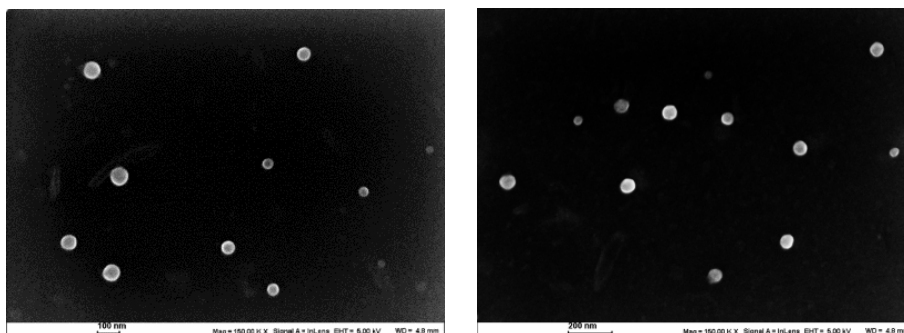

**Figure S3.** SEM images of SCF NPs.

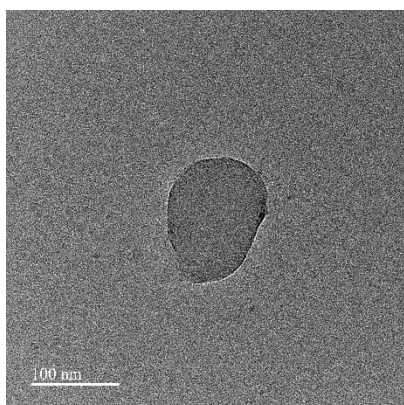

**Figure S4.** TEM image of SCF NPs.

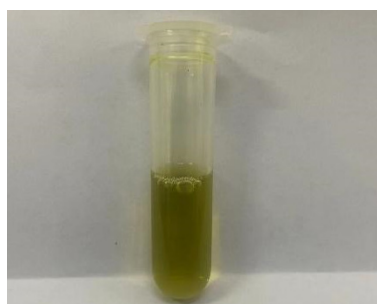

**Figure S5.** The photo of PBS aqueous solution after incubating SCF NPs for 14 days.

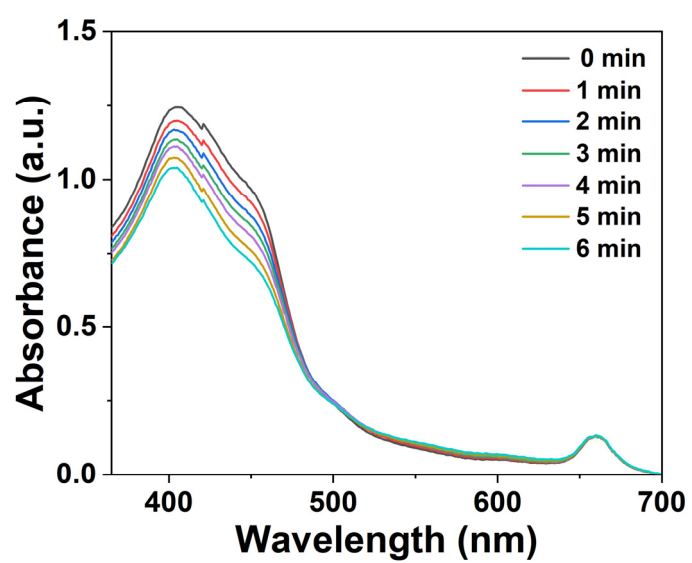

**Figure S6.** The degradation of DPBF with the presence of SCF NPs under 660 nm laser irradiation.

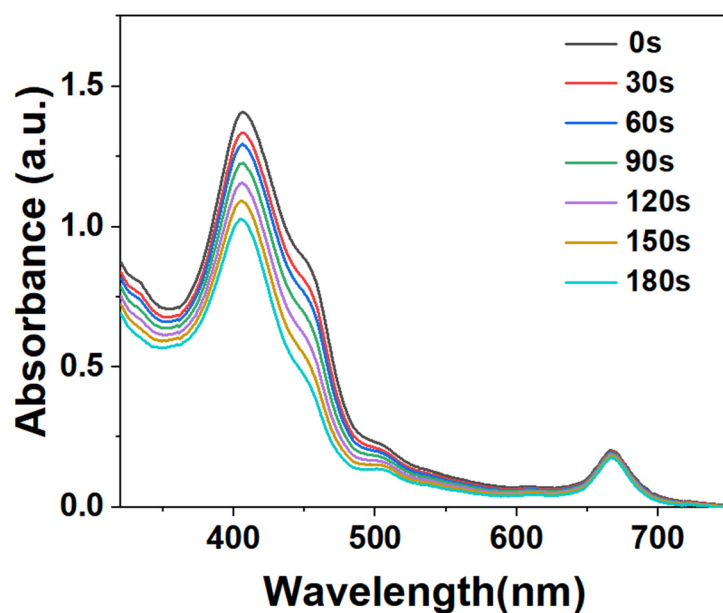

**Figure S7.** The degradation of DPBF with the presence of Ce6-PEG2000-FA under 660 nm laser irradiation.

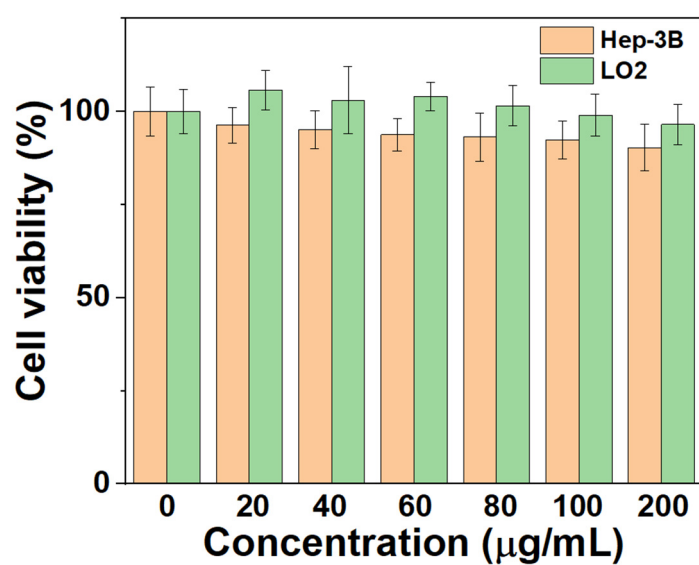

**Figure S8.** Cytotoxicity assay of Hep-3B and LO2 cell incubated with different

concentrations (20, 40, 60, 80, 100, 200  $\mu\text{g/mL}$ ) of Ce6-PEG2000-FA.
